# Supplementary material for: New extended poly(oxomolybdophosphates) based on strontium(ii) linkers
Source: Royal Society of Chemistry journal article supplement (doi:10.1039/c0ce00727g), 2011-01-01
Supplement: c0ce00727g.pdf [file c0ce00727g.pdf]

## Supporting information

# New extended poly(oxomolybdophosphates) based on strontium(II) linkers

Kai Yu,<sup>a,b</sup> Wei-Lin Chen,<sup>c</sup> Bai-Bin Zhou,<sup>\*a,b</sup> Yang-Guang Li,<sup>\*c</sup> Yang Yu,<sup>a</sup> Zhan-Hua Su,<sup>a</sup> Song Gao<sup>a</sup> and Ying Chen<sup>a</sup>

### 1. Structural figures

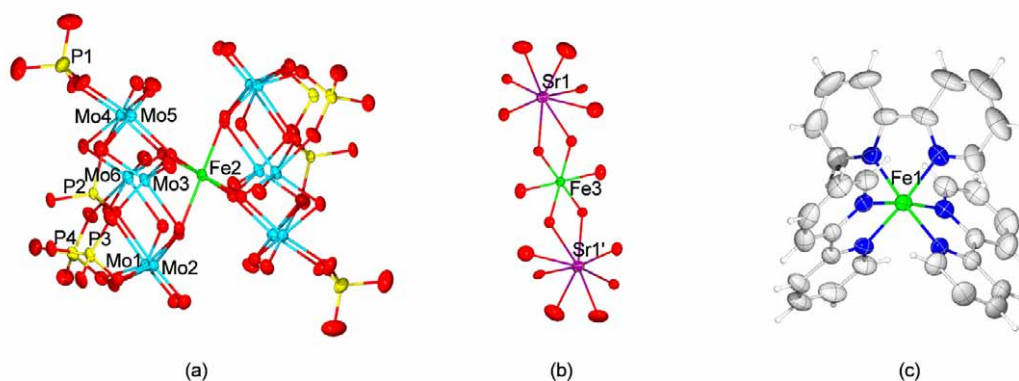

**Fig. S1** ORTEP view of the basic units in compound **1** with 50% thermal ellipsoids: **(a)** the sandwich-type  $\{\text{Fe}(\text{P}_4\text{Mo}_6)_2\}$  unit; **(b)** the trinuclear  $\{\text{Sr}_2\text{Fe}\}$  linker; **(c)** the  $[\text{Fe}(\text{2,2}'\text{-bpy})_3]^{3+}$  cationic unit.

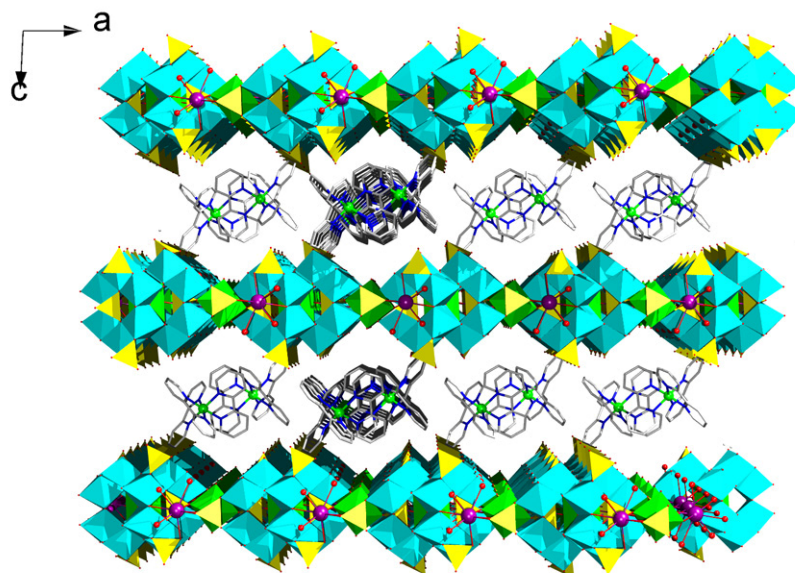

**Fig. S2** The packing arrangement of compound **1** viewed along *b* axis. The isolated sodium cations, phosphate anions, and solvent water molecules are omitted for clarity.

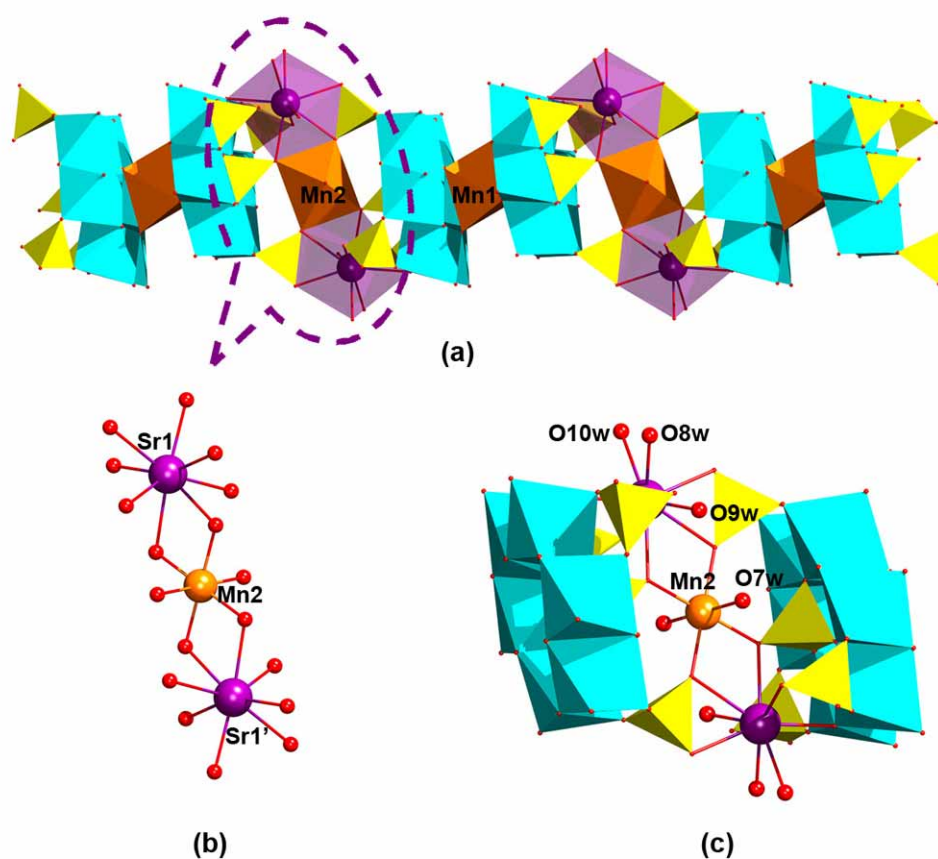

**Fig. S3** (a) 1-D chain of the poly(oxomolybdophosphate) based on  $\{Mn(P_4Mo_6)_2\}$  units and  $\{Sr_2Mn\}$  linkers in **2**; (b) The trinuclear linking moiety of  $\{Sr_2Mn\}$  in **2**; (c) Connection mode between trinuclear  $\{Sr_2Mn\}$  unit and its adjacent  $\{P_4Mo_6\}$  fragments in **2**.

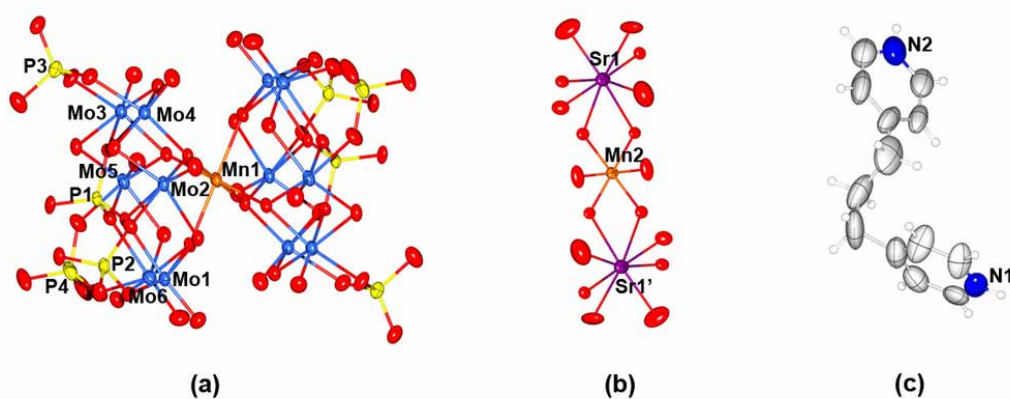

**Fig. S4** ORTEP view of the basic units in compound **2** with 50% thermal ellipsoids: (a) the sandwich-type  $\{Mn(P_4Mo_6)_2\}$  unit; (b) the trinuclear  $\{Sr_2Mn\}$  linker; (c)  $[H_2bpp]^{2+}$  protonated ligand.

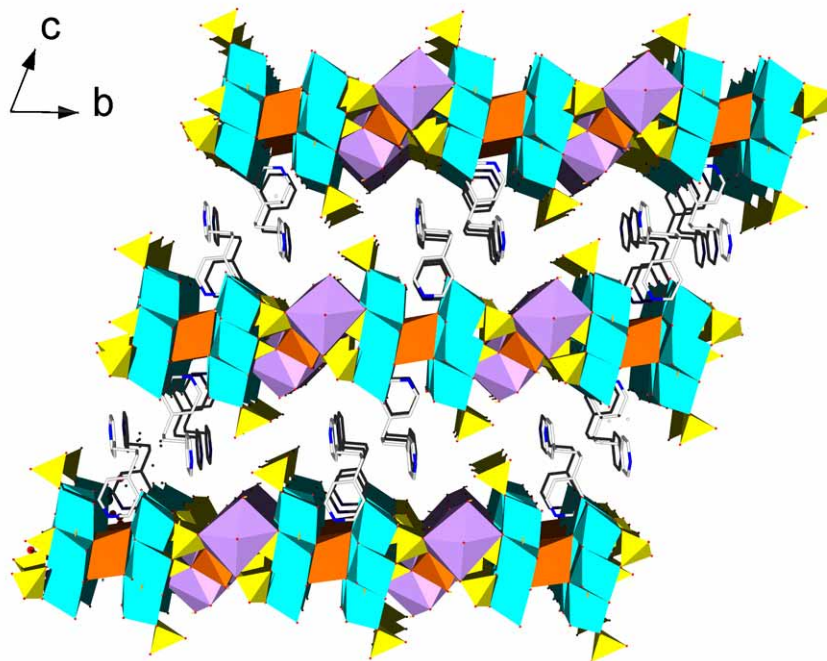

**Fig. S5** The packing arrangement of compound **2** viewed along *a* axis. The isolated solvent water molecules are omitted for clarity.

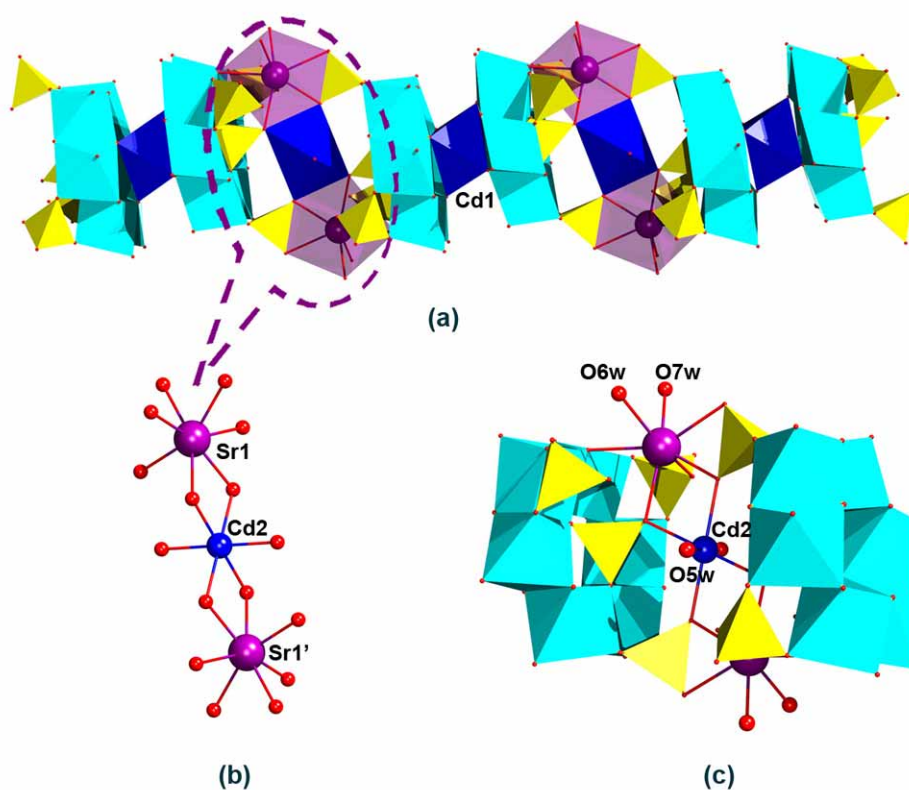

**Fig. S6** (a) 1-D chain of the poly(oxomolybdophosphate) based on  $\{Cd(P_4Mo_6)_2\}$  units and  $\{Sr_2Cd\}$  linkers in **3**; (b) The trinuclear linking moiety of  $\{Sr_2Cd\}$  in **3**; (c) Connection mode between trinuclear  $\{Sr_2Cd\}$  unit and its adjacent  $\{P_4Mo_6\}$  fragments in **3**.

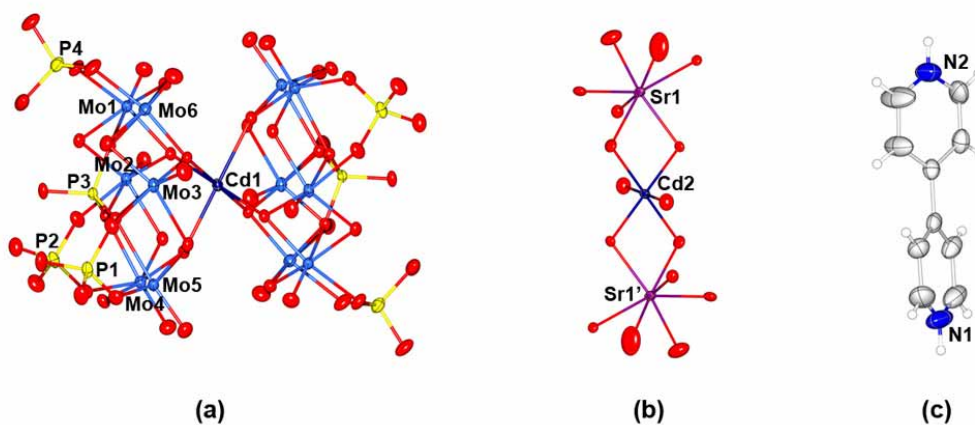

**Fig. S7.** ORTEP view of the basic units in compound **3** with 50% thermal ellipsoids: (a) the sandwich-type  $\{Cd(P_4Mo_6)_2\}$  unit; (b) the trinuclear  $\{Sr_2Cd\}$  linker; (c)  $[H_2bpy]^{2+}$  protonated ligand.

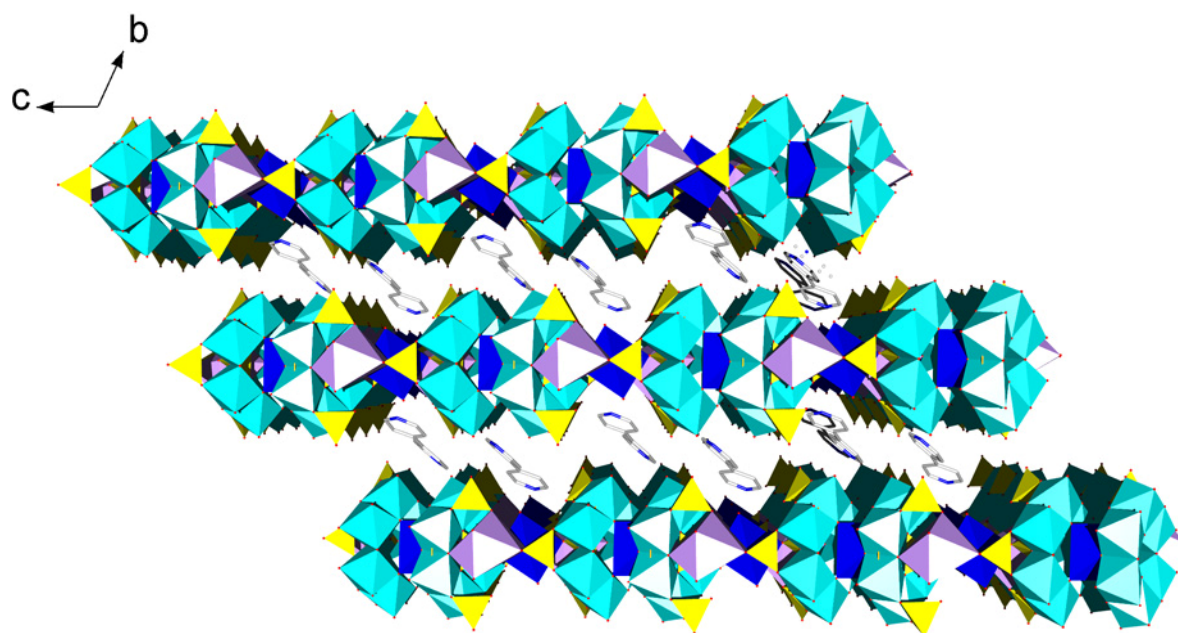

**Fig. S8.** The packing arrangement of compound **3** viewed along *a* axis. The isolated solvent water molecules are omitted for clarity.

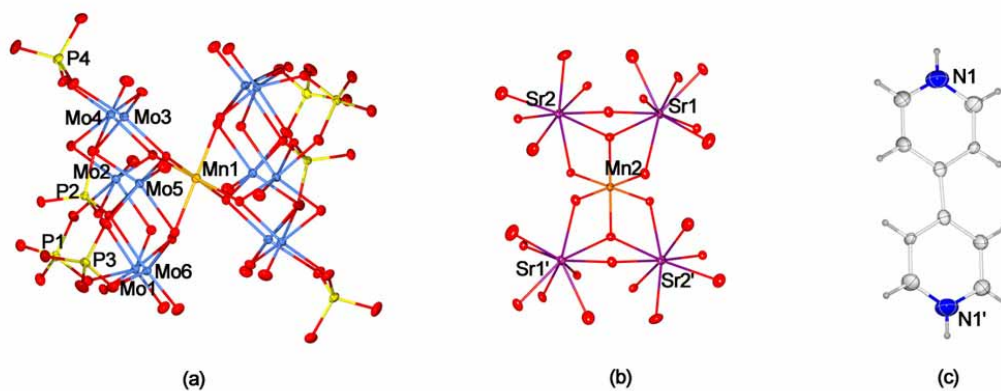

**Fig. S9.** ORTEP view of the basic units in compound **4** with 50% thermal ellipsoids: (a) the sandwich-type  $\{\text{Mn}(\text{P}_4\text{Mo}_6)_2\}$  unit; (b) the trinuclear  $\{\text{Sr}_4\text{Mn}\}$  linker; (c)  $[\text{H}_2\text{bpy}]^{2+}$  protonated ligand.

## 2. Structural data

**Table S1** Selected bond lengths (Å) and bond angles (°) of compound **1**

|                      |                  |                      |                  |                      |                 |
|----------------------|------------------|----------------------|------------------|----------------------|-----------------|
| Mo(1)-O(27)          | 1.671(3)         | Mo(3)-O(18)          | 1.677(3)         | Mo(5)-O(29)          | 1.674(3)        |
| Mo(1)-O(7)           | 1.941(3)         | Mo(3)-O(14)          | 1.931(3)         | Mo(5)-O(14)          | 1.933(3)        |
| Mo(1)-O(1)           | 1.977(3)         | Mo(3)-O(3)           | 1.974(3)         | Mo(5)-O(3)           | 1.983(3)        |
| Mo(1)-O(17)          | 2.056(3)         | Mo(3)-O(10)#1        | 2.077(3)         | Mo(5)-O(20)#1        | 2.061(3)        |
| Mo(1)-O(13)          | 2.104(3)         | Mo(3)-O(8)#1         | 2.118(3)         | Mo(5)-O(6)#1         | 2.101(3)        |
| Mo(1)-O(12)          | 2.302(3)         | Mo(3)-O(5)#1         | 2.289(3)         | Mo(5)-O(4)#1         | 2.301(3)        |
| Mo(2)-O(19)          | 1.674(3)         | Mo(4)-O(24)          | 1.677(3)         | Mo(6)-O(21)          | 1.681(3)        |
| Mo(2)-O(7)           | 1.941(3)         | Mo(4)-O(16)          | 1.951(3)         | Mo(6)-O(16)          | 1.942(3)        |
| Mo(2)-O(1)           | 1.980(3)         | Mo(4)-O(2)           | 1.977(3)         | Mo(6)-O(2)           | 1.975(3)        |
| Mo(2)-O(9)           | 2.072(3)         | Mo(4)-O(22)          | 2.051(3)         | Mo(6)-O(25)          | 2.038(3)        |
| Mo(2)-O(8)           | 2.116(3)         | Mo(4)-O(6)           | 2.092(3)         | Mo(6)-O(13)          | 2.081(3)        |
| Mo(2)-O(5)           | 2.269(3)         | Mo(4)-O(4)           | 2.254(3)         | Mo(6)-O(12)          | 2.291(3)        |
| <b>Mo(1)...Mo(2)</b> | <b>2.5963(5)</b> | <b>Mo(4)...Mo(6)</b> | <b>2.5976(5)</b> | <b>Mo(3)...Mo(5)</b> | <b>2.587(5)</b> |
| Sr(1)-O(28)          | 2.494(4)         | Sr(1)-O(15)          | 2.610(3)         | Sr(1)-O(11)#2        | 2.705(3)        |
| Sr(1)-O(9W)          | 2.543(5)         | Sr(1)-O(16)          | 2.621(3)         | Sr(1)-O(10W)         | 2.702(5)        |
| Sr(1)-O(26)#2        | 2.597(3)         | Sr(1)-O(8W)          | 2.655(6)         |                      |                 |
| Fe(1)-N(6)           | 1.965(5)         | Fe(2)-O(2)#1         | 2.096(3)         | Fe(3)-O(15)#2        | 2.100(3)        |
| Fe(1)-N(1)           | 1.968(5)         | Fe(2)-O(2)           | 2.096(3)         | Fe(3)-O(15)          | 2.100(3)        |
| Fe(1)-N(4)           | 1.966(4)         | Fe(2)-O(1)           | 2.192(3)         | Fe(3)-O(7W)#2        | 2.153(4)        |
| Fe(1)-N(5)           | 1.968(5)         | Fe(2)-O(1)#1         | 2.192(3)         | Fe(3)-O(7W)          | 2.153(4)        |
| Fe(1)-N(3)           | 1.969(5)         | Fe(2)-O(3)           | 2.228(3)         | Fe(3)-O(11)          | 2.168(3)        |
| Fe(1)-N(2)           | 1.970(4)         | Fe(2)-O(3)#1         | 2.228(3)         | Fe(3)-O(11)#2        | 2.168(3)        |
| P(1)-O(23)           | 1.515(5)         | P(2)-O(15)           | 1.508(3)         | P(3)-O(11)           | 1.499(3)        |
| P(1)-O(22)           | 1.517(4)         | P(2)-O(4)            | 1.544(3)         | P(3)-O(10)           | 1.529(3)        |
| P(1)-O(20)           | 1.531(4)         | P(2)-O(5)            | 1.544(3)         | P(3)-O(9)            | 1.536(3)        |
| P(1)-O(31)           | 1.557(4)         | P(2)-O(12)           | 1.549(3)         | P(3)-O(26)           | 1.591(3)        |
| P(4)-O(28)           | 1.501(3)         | P(4)-O(25)           | 1.544(3)         |                      |                 |
| P(4)-O(17)           | 1.528(3)         | P(4)-O(30)           | 1.574(4)         |                      |                 |
| O(27)-Mo(1)-O(13)    | 97.82(14)        | O(19)-Mo(2)-O(8)     | 96.26(14)        | O(18)-Mo(3)-O(8)#1   | 97.18(15)       |
| O(7)-Mo(1)-O(13)     | 156.35(12)       | O(7)-Mo(2)-O(8)      | 156.89(12)       | O(14)-Mo(3)-O(8)#1   | 155.60(12)      |
| O(1)-Mo(1)-O(13)     | 85.55(11)        | O(1)-Mo(2)-O(8)      | 86.57(11)        | O(3)-Mo(3)-O(8)#1    | 85.88(11)       |
| O(17)-Mo(1)-O(13)    | 84.75(12)        | O(9)-Mo(2)-O(8)      | 84.37(12)        | O(10)#1-Mo(3)-O(8)#1 | 85.01(12)       |
| O(13)-Mo(1)-O(12)    | 73.20(11)        | O(8)-Mo(2)-O(5)      | 72.67(10)        | O(10)#1-Mo(3)-O(5)#1 | 78.57(11)       |
| O(24)-Mo(4)-O(6)     | 96.54(15)        | O(29)-Mo(5)-O(6)#1   | 98.08(15)        | O(21)-Mo(6)-O(13)    | 99.15(15)       |
| O(16)-Mo(4)-O(6)     | 157.15(12)       | O(14)-Mo(5)-O(6)#1   | 154.89(13)       | O(16)-Mo(6)-O(13)    | 155.04(12)      |
| O(2)-Mo(4)-O(6)      | 87.10(12)        | O(3)-Mo(5)-O(6)#1    | 85.69(12)        | O(2)-Mo(6)-O(13)     | 87.19(12)       |
| O(22)-Mo(4)-O(6)     | 85.83(14)        | O(20)#1-Mo(5)-O(6)#1 | 83.48(13)        | O(25)-Mo(6)-O(13)    | 83.01(13)       |
| O(6)-Mo(4)-O(4)      | 73.92(11)        | O(6)#1-Mo(5)-O(4)#1  | 72.76(11)        | O(13)-Mo(6)-O(12)    | 73.84(11)       |
| O(28)-Sr(1)-O(9W)    | 78.47(16)        | O(28)-Sr(1)-O(8W)    | 146.52(17)       | O(28)-Sr(1)-O(15)    | 85.41(12)       |
| O(28)-Sr(1)-O(26)#2  | 91.50(11)        | O(28)-Sr(1)-O(11)#2  | 76.92(11)        | O(28)-Sr(1)-O(16)    | 98.90(10)       |
| O(28)-Sr(1)-O(10W)   | 146.20(13)       |                      |                  |                      |                 |
| N(6)-Fe(1)-N(1)      | 95.62(19)        | O(2)#1-Fe(2)-O(1)    | 83.59(11)        | O(15)#2-Fe(3)-O(7W)  | 86.57(13)       |
| N(6)-Fe(1)-N(4)      | 174.8(2)         | O(2)-Fe(2)-O(1)      | 96.41(11)        | O(15)-Fe(3)-O(7W)    | 93.43(13)       |
| N(6)-Fe(1)-N(5)      | 82.1(2)          | O(1)-Fe(2)-O(1)#1    | <b>180.00</b>    | O(7W)#2-Fe(3)-O(7W)  | <b>180.00</b>   |
| N(6)-Fe(1)-N(3)      | 88.2(2)          | O(1)-Fe(2)-O(3)#1    | 95.44(10)        | O(7W)-Fe(3)-O(11)    | 85.67(13)       |
| N(6)-Fe(1)-N(2)      | 94.0(2)          | O(1)-Fe(2)-O(3)      | 84.56(10)        | O(7W)-Fe(3)-O(11)#2  | 94.33(13)       |

Symmetry transformations used to generate equivalent atoms: #1 -x,-y,-z; #2 -x+1/2,-y+1/2,-z

**Table S2** Selected bond lengths (Å) and bond angles (°) of compound **2**

|                      |                   |                      |                   |                      |                   |
|----------------------|-------------------|----------------------|-------------------|----------------------|-------------------|
| Mo(1)-O(30)          | 1.675(5)          | Mo(3)-O(15)          | 1.676(5)          | Mo(5)-O(31)          | 1.677(5)          |
| Mo(1)-O(19)          | 1.948(5)          | Mo(3)-O(11)          | 1.950(5)          | Mo(5)-O(11)          | 1.949(5)          |
| Mo(1)-O(3)           | 1.973(5)          | Mo(3)-O(1)           | 1.974(5)          | Mo(5)-O(1)           | 1.976(5)          |
| Mo(1)-O(13)#1        | 2.077(5)          | Mo(3)-O(24)          | 2.071(5)          | Mo(5)-O(20)          | 2.061(5)          |
| Mo(1)-O(8)           | 2.103(5)          | Mo(3)-O(9)#1         | 2.094(5)          | Mo(5)-O(10)          | 2.094(5)          |
| Mo(1)-O(2)           | 2.268(5)          | Mo(3)-O(6)           | 2.266(5)          | Mo(5)-O(12)          | 2.271(5)          |
| Mo(2)-O(25)          | 1.667(5)          | Mo(4)-O(14)          | 1.671(5)          | Mo(6)-O(29)          | 1.670(6)          |
| Mo(2)-O(7)           | 1.935(5)          | Mo(4)-O(7)           | 1.938(5)          | Mo(6)-O(19)          | 1.938(5)          |
| Mo(2)-O(4)           | 1.977(5)          | Mo(4)-O(4)           | 1.987(5)          | Mo(6)-O(3)           | 1.973(5)          |
| Mo(2)-O(5)           | 2.042(5)          | Mo(4)-O(23)#1        | 2.061(5)          | Mo(6)-O(28)          | 2.062(6)          |
| Mo(2)-O(8)#1         | 2.104(5)          | Mo(4)-O(9)           | 2.097(5)          | Mo(6)-O(10)          | 2.097(5)          |
| Mo(2)-O(2)#1         | 2.300(5)          | Mo(4)-O(6)#1         | 2.300(5)          | Mo(6)-O(12)          | 2.272(5)          |
| <b>Mo(1)...Mo(6)</b> | <b>2.5991(12)</b> | <b>Mo(2)...Mo(4)</b> | <b>2.6054(10)</b> | <b>Mo(3)...Mo(5)</b> | <b>2.5976(10)</b> |
| Mn(1)-O(4)           | 2.195(5)          | Mn(1)-O(3)           | 2.214(5)          | Mn(1)-O(1)           | 2.221(5)          |
| Mn(1)-O(4)#1         | 2.195(5)          | Mn(1)-O(3)#1         | 2.214(5)          | Mn(1)-O(1)#1         | 2.221(5)          |
| Mn(2)-O(16)#2        | 2.165(5)          | Mn(2)-O(17)#3        | 2.171(5)          | Mn(2)-O(7W)          | 2.222(6)          |
| Mn(2)-O(16)          | 2.165(5)          | Mn(2)-O(17)#1        | 2.171(5)          | Mn(2)-O(7W)#2        | 2.222(6)          |
| Sr(1)-O(8W)          | 2.706(14)         | Sr(1)-O(18)#3        | 2.596(5)          | Sr(1)-O(21)          | 2.610(6)          |
| Sr(1)-O(8AW)         | 2.377(17)         | Sr(1)-O(11)          | 2.600(5)          | Sr(1)-O(9W)          | 2.611(10)         |
| Sr(1)-O(16)          | 2.638(5)          | Sr(1)-O(10W)         | 2.568(8)          | Sr(1)-O(17)#3        | 2.725(5)          |
| P(1)-O(16)           | 1.509(5)          | P(2)-O(17)           | 1.509(5)          | P(3)-O(22)           | 1.501(6)          |
| P(1)-O(12)           | 1.550(5)          | P(2)-O(5)            | 1.535(5)          | P(3)-O(24)           | 1.527(5)          |
| P(1)-O(2)            | 1.549(5)          | P(2)-O(13)           | 1.536(5)          | P(3)-O(23)           | 1.529(6)          |
| P(1)-O(6)            | 1.552(5)          | P(2)-O(18)           | 1.566(5)          | P(3)-O(21)           | 1.579(6)          |
| P(4)-O(27)           | 1.505(6)          | P(4)-O(28)           | 1.534(6)          |                      |                   |
| P(4)-O(20)           | 1.525(6)          | P(4)-O(26)           | 1.562(6)          |                      |                   |
| O(30)-Mo(1)-O(8)     | 96.9(2)           | O(25)-Mo(2)-O(8)#1   | 98.4(2)           | O(15)-Mo(3)-O(9)#1   | 96.3(2)           |
| O(19)-Mo(1)-O(8)     | 157.3(2)          | O(7)-Mo(2)-O(8)#1    | 155.0(2)          | O(11)-Mo(3)-O(9)#1   | 155.4(2)          |
| O(3)-Mo(1)-O(8)      | 85.30(19)         | O(4)-Mo(2)-O(8)#1    | 86.84(19)         | O(1)-Mo(3)-O(9)#1    | 85.99(19)         |
| O(13)#1-Mo(1)-O(8)   | 85.29(19)         | O(5)-Mo(2)-O(8)#1    | 83.22(19)         | O(24)-Mo(3)-O(9)#1   | 86.1(2)           |
| O(8)-Mo(1)-O(2)      | 72.78(18)         | O(8)#1-Mo(2)-O(2)#1  | 72.11(17)         | O(9)#1-Mo(3)-O(6)    | 72.89(18)         |
| O(14)-Mo(4)-O(9)     | 98.7(2)           | O(31)-Mo(5)-O(10)    | 98.2(2)           | O(29)-Mo(6)-O(10)    | 97.9(3)           |
| O(7)-Mo(4)-O(9)      | 155.0(2)          | O(11)-Mo(5)-O(10)    | 154.6(2)          | O(19)-Mo(6)-O(10)    | 155.3(2)          |
| O(4)-Mo(4)-O(9)      | 86.08(19)         | O(1)-Mo(5)-O(10)     | 85.59(19)         | O(3)-Mo(6)-O(10)     | 86.2(2)           |
| O(23)#1-Mo(4)-O(9)   | 84.9(2)           | O(20)-Mo(5)-O(10)    | 85.3(2)           | O(28)-Mo(6)-O(10)    | 84.4(2)           |
| O(9)-Mo(4)-O(6)#1    | 72.14(18)         | O(10)-Mo(5)-O(12)    | 72.42(18)         | O(10)-Mo(6)-O(12)    | 72.35(18)         |
| O(4)-Mn(1)-O(1)      | 84.52(17)         | O(3)-Mn(1)-O(1)      | 96.13(17)         | O(1)-Mn(1)-O(1)#1    | 180.00            |
| O(4)#1-Mn(1)-O(1)    | 95.48(17)         | O(3)#1-Mn(1)-O(1)    | 83.87(17)         |                      |                   |
| O(16)#2-Mn(2)-O(7)   | 88.1(2)           | O(17)#3-Mn(2)-O(7W)  | 91.8(2)           | O(7W)-Mn(2)-O(7W)#   | 180.00            |
| O(16)-Mn(2)-O(7W)    | 91.9(2)           | O(17)#1-Mn(2)-O(7W)  | 88.2(2)           |                      |                   |
| O(10W)-Sr(1)-O(18)   | 75.3(2)           | O(10W)-Sr(1)-O(9W)   | 129.8(3)          | O(10W)-Sr(1)-O(17)#3 | 123.7(2)          |
| O(10W)-Sr(1)-O(11)   | 85.4(2)           | O(10W)-Sr(1)-O(16)   | 160.6(2)          |                      |                   |
| O(10W)-Sr(1)-O(21)   | 85.0(2)           | O(10W)-Sr(1)-O(8W)   | 69.9(4)           |                      |                   |

Symmetry transformations used to generate equivalent atoms: #1 -x+2,-y+1,-z+2; #2 -x+2,-y+2,-z+2; #3 x,y+1,z

**Table S3** Selected bond lengths (Å) and bond angles (°) of compound **3**

|                      |                  |                      |                  |                       |                  |
|----------------------|------------------|----------------------|------------------|-----------------------|------------------|
| Mo(1)-O(19)          | 1.676(3)         | Mo(3)-O(24)          | 1.677(3)         | Mo(5)-O(29)           | 1.678(3)         |
| Mo(1)-O(5)           | 1.951(3)         | Mo(3)-O(11)          | 1.927(3)         | Mo(5)-O(12)           | 1.932(3)         |
| Mo(1)-O(1)           | 1.968(3)         | Mo(3)-O(2)           | 1.970(3)         | Mo(5)-O(4)            | 1.970(3)         |
| Mo(1)-O(20)          | 2.073(3)         | Mo(3)-O(14)#1        | 2.066(3)         | Mo(5)-O(17)#1         | 2.034(3)         |
| Mo(1)-O(13)          | 2.121(3)         | Mo(3)-O(3)           | 2.136(3)         | Mo(5)-O(3)            | 2.111(3)         |
| Mo(1)-O(7)           | 2.251(3)         | Mo(3)-O(10)#2        | 2.301(3)         | Mo(5)-O(10)#2         | 2.324(3)         |
| Mo(2)-O(22)          | 1.672(3)         | Mo(4)-O(18)          | 1.678(3)         | Mo(6)-O(31)           | 1.671(4)         |
| Mo(2)-O(5)           | 1.940(3)         | Mo(4)-O(12)          | 1.940(3)         | Mo(6)-O(11)           | 1.937(3)         |
| Mo(2)-O(1)           | 1.972(3)         | Mo(4)-O(4)           | 1.970(3)         | Mo(6)-O(2)            | 1.969(3)         |
| Mo(2)-O(6)           | 2.060(3)         | Mo(4)-O(21)#2        | 2.052(3)         | Mo(6)-O(25)#2         | 2.056(3)         |
| Mo(2)-O(9)           | 2.116(3)         | Mo(4)-O(9)#2         | 2.148(3)         | Mo(6)-O(13)#2         | 2.125(3)         |
| Mo(2)-O(8)           | 2.319(3)         | Mo(4)-O(8)#2         | 2.281(3)         | Mo(6)-O(7)#2          | 2.282(3)         |
| <b>Mo(1)...Mo(2)</b> | <b>2.6160(6)</b> | <b>Mo(3)...Mo(6)</b> | <b>2.6060(6)</b> | <b>Mo(4)...Mo(5)</b>  | <b>2.5994(6)</b> |
| Cd(1)-O(2)           | 2.268(3)         | Cd(1)-O(4)           | 2.277(3)         | Cd(1)-O(1)            | 2.293(3)         |
| Cd(1)-O(2)#2         | 2.268(3)         | Cd(1)-O(4)#2         | 2.277(3)         | Cd(1)-O(1)#2          | 2.293(3)         |
| Cd(2)-O(15)          | 2.243(3)         | Cd(2)-O(5W)          | 2.284(4)         | Cd(2)-O(30)#3         | 2.333(3)         |
| Cd(2)-O(15)#3        | 2.243(3)         | Cd(2)-O(5W)#3        | 2.284(4)         | Cd(2)-O(30)           | 2.333(3)         |
| Sr(1)-O(26)          | 2.402(4)         | Sr(1)-O(7W)          | 2.497(7)         | Sr(1)-O(27)           | 2.707(3)         |
| Sr(1)-O(6W)          | 2.427(5)         | Sr(1)-O(15)          | 2.555(3)         |                       |                  |
| Sr(1)-O(30)          | 2.449(4)         | Sr(1)-O(5)           | 2.629(3)         |                       |                  |
| P(1)-O(30)           | 1.518(3)         | P(2)-O(26)           | 1.513(4)         | P(3)-O(15)            | 1.517(3)         |
| P(1)-O(17)           | 1.539(4)         | P(2)-O(21)           | 1.532(4)         | P(3)-O(10)            | 1.539(3)         |
| P(1)-O(27)           | 1.547(3)         | P(2)-O(6)            | 1.534(3)         | P(3)-O(8)             | 1.546(3)         |
| P(1)-O(14)           | 1.550(3)         | P(2)-O(23)           | 1.569(3)         | P(3)-O(7)             | 1.546(3)         |
| P(4)-O(28)           | 1.519(4)         | P(4)-O(25)           | 1.522(4)         | P(4)-O(20)            | 1.530(4)         |
| P(4)-O(16)           | 1.579(4)         |                      |                  |                       |                  |
| O(19)-Mo(1)-O(13)    | 97.90(15)        | O(22)-Mo(2)-O(9)     | 99.91(15)        | O(24)-Mo(3)-O(3)      | 97.24(15)        |
| O(5)-Mo(1)-O(13)     | 153.45(13)       | O(5)-Mo(2)-O(9)      | 151.00(13)       | O(11)-Mo(3)-O(3)      | 155.81(13)       |
| O(1)-Mo(1)-O(13)     | 86.68(12)        | O(1)-Mo(2)-O(9)      | 86.53(12)        | O(2)-Mo(3)-O(3)       | 85.66(12)        |
| O(20)-Mo(1)-O(13)    | 86.08(13)        | O(6)-Mo(2)-O(9)      | 83.78(13)        | O(14)#1-Mo(3)-O(3)    | 85.35(13)        |
| O(13)-Mo(1)-O(7)     | 70.08(11)        | O(9)-Mo(2)-O(8)      | 71.22(11)        | O(3)-Mo(3)-O(10)#2    | 72.49(12)        |
| O(18)-Mo(4)-O(9)#2   | 97.44(15)        | O(29)-Mo(5)-O(3)     | 98.73(15)        | O(31)-Mo(6)-O(13)#2   | 100.39(16)       |
| O(12)-Mo(4)-O(9)#2   | 156.05(13)       | O(12)-Mo(5)-O(3)     | 154.43(13)       | O(11)-Mo(6)-O(13)#2   | 151.93(13)       |
| O(4)-Mo(4)-O(9)#2    | 85.73(12)        | O(4)-Mo(5)-O(3)      | 86.63(12)        | O(2)-Mo(6)-O(13)#2    | 87.52(13)        |
| O(21)#2-Mo(4)-O(9)#2 | 85.44(12)        | O(17)#1-Mo(5)-O(3)   | 82.55(13)        | O(25)#2-Mo(6)-O(13)#2 | 83.38(13)        |
| O(9)#2-Mo(4)-O(8)#2  | 71.43(11)        | O(3)-Mo(5)-O(10)#2   | 72.44(11)        | O(13)#2-Mo(6)-O(7)#2  | 69.41(11)        |
| O(2)-Cd(1)-O(1)      | 81.05(11)        | O(4)-Cd(1)-O(1)      | 83.66(11)        | O(1)-Cd(1)-O(1)#2     | 180.00           |
| O(2)#2-Cd(1)-O(1)    | 98.95(11)        | O(4)#2-Cd(1)-O(1)    | 96.34(11)        |                       |                  |
| O(15)-Cd(2)-O(5W)    | 93.79(13)        | O(5W)-Cd(2)-O(30)    | 91.27(14)        | O(5W)-Cd(2)-O(5W)#3   | 180.00           |
| O(15)#3-Cd(2)-O(5W)  | 86.21(13)        | O(5W)-Cd(2)-O(30)#3  | 88.73(14)        |                       |                  |
| O(26)-Sr(1)-O(6W)    | 80.37(15)        | O(6W)-Sr(1)-O(7W)    | 75.9(2)          | O(6W)-Sr(1)-O(5)      | 82.59(14)        |
| O(6W)-Sr(1)-O(30)    | 127.54(15)       | O(6W)-Sr(1)-O(15)    | 155.36(14)       | O(6W)-Sr(1)-O(27)     | 78.11(14)        |

Symmetry transformations used to generate equivalent atoms: #1 x,y,z+1; #2 -x,-y+1,-z+2; #3 -x,-y+1,-z+1



**Table S4** Selected bond lengths (Å) and bond angles (°) of compound **4**

|                      |                  |                      |                  |                       |                  |
|----------------------|------------------|----------------------|------------------|-----------------------|------------------|
| Mo(1)-O(4)           | 1.681(2)         | Mo(3)-O(1)           | 1.672(2)         | Mo(5)-O(5)            | 1.679(2)         |
| Mo(1)-O(20)          | 1.939(2)         | Mo(3)-O(12)          | 1.954(2)         | Mo(5)-O(12)           | 1.954(2)         |
| Mo(1)-O(6)           | 1.982(2)         | Mo(3)-O(11)          | 1.978(2)         | Mo(5)-O(11)           | 1.972(2)         |
| Mo(1)-O(16)          | 2.028(2)         | Mo(3)-O(22)          | 2.066(2)         | Mo(5)-O(25)           | 2.064(2)         |
| Mo(1)-O(7)           | 2.105(2)         | Mo(3)-O(9)           | 2.093(2)         | Mo(5)-O(29)           | 2.099(2)         |
| Mo(1)-O(14)          | 2.272(2)         | Mo(3)-O(8)           | 2.264(2)         | Mo(5)-O(18)           | 2.268(2)         |
| Mo(2)-O(2)           | 1.673(2)         | Mo(4)-O(24)          | 1.679(2)         | Mo(6)-O(3)            | 1.672(2)         |
| Mo(2)-O(19)          | 1.948(2)         | Mo(4)-O(19)          | 1.940(2)         | Mo(6)-O(20)           | 1.933(2)         |
| Mo(2)-O(10)          | 1.973(2)         | Mo(4)-O(10)          | 1.978(2)         | Mo(6)-O(6)            | 1.981(2)         |
| Mo(2)-O(15)          | 2.047(2)         | Mo(4)-O(23)          | 2.064(2)         | Mo(6)-O(26)           | 2.061(2)         |
| Mo(2)-O(7)           | 2.095(2)         | Mo(4)-O(9)           | 2.114(2)         | Mo(6)-O(29)           | 2.130(2)         |
| Mo(2)-O(14)          | 2.290(2)         | Mo(4)-O(8)           | 2.261(2)         | Mo(6)-O(18)           | 2.281(2)         |
| <b>Mo(1)...Mo(6)</b> | <b>2.5924(4)</b> | <b>Mo(2)...Mo(4)</b> | <b>2.5967(4)</b> | <b>Mo(3)...Mo(5)</b>  | <b>2.6004(4)</b> |
| Sr(1)-O(21)#1        | 2.553(2)         | Sr(1)-O(19)          | 2.642(2)         | Sr(1)-O(27)           | 2.762(2)         |
| Sr(1)-O(8W)          | 2.571(3)         | Sr(1)-O(7W)          | 2.692(3)         | Sr(1)-O(31)#2         | 2.781(3)         |
| Sr(1)-O(28)#2        | 2.637(2)         | Sr(1)-O(10W)#1       | 2.719(2)         | Sr(1)-O(15)           | 2.813(2)         |
| Sr(2)-O(17)          | 2.556(2)         | Sr(2)-O(12)#1        | 2.633(2)         | Sr(2)-O(21)#1         | 2.640(2)         |
| Sr(2)-O(6W)          | 2.593(3)         | Sr(2)-O(5W)          | 2.681(4)         | Sr(2)-O(27)           | 2.676(2)         |
| Sr(2)-O(13)#1        | 2.612(2)         | Sr(2)-O(5AW)         | 2.672(12)        | Sr(2)-O(9W)           | 2.718(3)         |
| Mn(1)-O(10)          | 2.179(2)         | Mn(1)-O(6)           | 2.197(2)         | Mn(1)-O(11)           | 2.248(2)         |
| Mn(1)-O(10)#3        | 2.179(2)         | Mn(1)-O(6)#3         | 2.197(2)         | Mn(1)-O(11)#3         | 2.248(2)         |
| Mn(2)-O(13)#1        | 2.136(2)         | Mn(2)-O(27)#1        | 2.194(2)         | Mn(2)-O(10W)          | 2.226(2)         |
| Mn(2)-O(13)          | 2.136(2)         | Mn(2)-O(27)          | 2.194(2)         | Mn(2)-O(10W)#1        | 2.226(2)         |
| P(1)-O(17)           | 1.522(2)         | P(2)-O(13)           | 1.509(2)         | P(3)-O(21)            | 1.504(2)         |
| P(1)-O(27)           | 1.536(2)         | P(2)-O(14)           | 1.540(2)         | P(3)-O(25)            | 1.534(2)         |
| P(1)-O(16)           | 1.537(2)         | P(2)-O(8)            | 1.547(2)         | P(3)-O(26)            | 1.543(2)         |
| P(1)-O(15)           | 1.557(2)         | P(2)-O(18)           | 1.552(2)         | P(3)-O(30)            | 1.574(2)         |
| P(4)-O(31)           | 1.503(2)         | P(4)-O(23)           | 1.541(2)         |                       |                  |
| P(4)-O(22)           | 1.533(2)         | P(4)-O(28)           | 1.568(2)         |                       |                  |
| O(4)-Mo(1)-O(7)      | 97.25(10)        | O(2)-Mo(2)-O(7)      | 97.18(10)        | O(1)-Mo(3)-O(9)       | 98.70(10)        |
| O(20)-Mo(1)-O(7)     | 156.51(8)        | O(19)-Mo(2)-O(7)     | 155.27(8)        | O(12)-Mo(3)-O(9)      | 154.55(8)        |
| O(6)-Mo(1)-O(7)      | 86.34(8)         | O(10)-Mo(2)-O(7)     | 87.32(8)         | O(11)-Mo(3)-O(9)      | 86.06(8)         |
| O(16)-Mo(1)-O(7)     | 84.63(8)         | O(15)-Mo(2)-O(7)     | 84.88(8)         | O(22)-Mo(3)-O(9)      | 84.90(9)         |
| O(7)-Mo(1)-O(14)     | 72.81(7)         | O(7)-Mo(2)-O(14)     | 72.60(7)         | O(9)-Mo(3)-O(8)       | 72.18(8)         |
| O(24)-Mo(4)-O(8)     | 168.54(10)       | O(5)-Mo(5)-O(29)     | 99.76(10)        | O(3)-Mo(6)-O(29)      | 98.55(10)        |
| O(19)-Mo(4)-O(8)     | 84.96(8)         | O(12)-Mo(5)-O(29)    | 154.55(8)        | O(20)-Mo(6)-O(29)     | 154.86(8)        |
| O(10)-Mo(4)-O(8)     | 80.70(8)         | O(11)-Mo(5)-O(29)    | 85.84(8)         | O(6)-Mo(6)-O(29)      | 86.68(8)         |
| O(23)-Mo(4)-O(8)     | 80.38(8)         | O(25)-Mo(5)-O(29)    | 84.96(8)         | O(26)-Mo(6)-O(29)     | 84.10(8)         |
| O(9)-Mo(4)-O(8)      | 71.91(8)         | O(29)-Mo(5)-O(18)    | 72.98(7)         | O(29)-Mo(6)-O(18)     | 72.17(7)         |
| O(21)#1-Sr(1)-O(8W)  | 120.69(9)        | O(8W)-Sr(1)-O(7W)    | 140.63(10)       | O(8W)-Sr(1)-O(31)#2   | 74.90(9)         |
| O(8W)-Sr(1)-O(28)#2  | 75.98(9)         | O(8W)-Sr(1)-O(10W)#1 | 70.26(9)         | O(8W)-Sr(1)-O(15)     | 129.55(8)        |
| O(8W)-Sr(1)-O(19)    | 70.86(8)         | O(8W)-Sr(1)-O(27)    | 130.38(9)        |                       |                  |
| O(17)-Sr(2)-O(6W)    | 73.61(8)         | O(6W)-Sr(2)-O(21)#1  | 74.74(8)         | O(6W)-Sr(2)-O(5W)     | 81.21(12)        |
| O(6W)-Sr(2)-O(13)#1  | 147.90(8)        | O(6W)-Sr(2)-O(27)    | 113.93(8)        | O(6W)-Sr(2)-O(5AW)    | 70.8(3)          |
| O(6W)-Sr(2)-O(12)#1  | 86.82(8)         | O(6W)-Sr(2)-O(9W)    | 140.40(9)        |                       |                  |
| O(13)#1-Mn(2)-O(10)  | 86.46(8)         | O(27)#1-Mn(2)-O(10W) | 87.57(8)         | O(10W)-Mn(2)-O(10W)#1 | 180.00           |
| O(13)-Mn(2)-O(10W)   | 93.54(8)         | O(27)-Mn(2)-O(10W)   | 92.43(8)         |                       |                  |
| O(10)-Mn(1)-O(6)     | 95.88(8)         | O(6)-Mn(1)-O(6)#3    | 180.00           | O(6)-Mn(1)-O(11)#3    | 83.54(7)         |
| O(10)#3-Mn(1)-O(6)   | 84.12(7)         | O(6)-Mn(1)-O(11)     | 96.46(7)         |                       |                  |

Symmetry transformations used to generate equivalent atoms: #1 -x+2,-y+1,-z+1; #2 x,-y+1/2,z-1/2; #3 -x+1,-y+1,-z+1

**Table S5.** BVS calculations of Mo centers in compounds **1-4**<sup>a</sup>

|     | <b>1</b> | <b>2</b> | <b>3</b> | <b>4</b> |
|-----|----------|----------|----------|----------|
| Mo1 | 5.23     | 5.19     | 5.19     | 5.25     |
| Mo2 | 5.19     | 5.27     | 5.20     | 5.25     |
| Mo3 | 5.19     | 5.19     | 5.19     | 5.22     |
| Mo4 | 5.25     | 5.21     | 5.17     | 5.20     |
| Mo5 | 5.22     | 5.21     | 5.24     | 5.20     |
| Mo6 | 5.26     | 5.26     | 5.25     | 5.09     |

<sup>a</sup>  $V = \sum_{i=1}^6 \exp\left(\frac{r_0 - r_i}{0.37}\right)$  ( $r_0 = 1.907(2)$  Å, ref: Brown, I. D.; Altermatt, D. *Acta. Crystallogr. Sect. B.* **1985**, *41*, 244-247).

**Table S6.** BVS calculations of P centers in compounds **1-4**<sup>a</sup>

|    | <b>1</b> | <b>2</b> | <b>3</b> | <b>4</b> |
|----|----------|----------|----------|----------|
| P1 | 5.09     | 4.91     | 4.95     | 4.95     |
| P2 | 4.98     | 4.98     | 4.97     | 4.97     |
| P3 | 4.97     | 5.02     | 4.97     | 4.94     |
| P4 | 4.99     | 5.05     | 5.00     | 4.99     |

<sup>a</sup>  $V = \sum_{i=1}^4 \exp\left(\frac{r_0 - r_i}{0.37}\right)$  ( $r_0 = 1.617(1)$  Å, ref: Brown, I. D.; Altermatt, D. *Acta. Crystallogr. Sect. B.* **1985**, *41*, 244-247).

**Table S7-1.** BVS calculations of Fe centers in compounds **1**

|     | $r_{\text{Fe(II)-N}} 1.761 \text{ \AA}^a$ | $r_{\text{Fe(III)-N}} 1.815 \text{ \AA}^a$ | $r_{\text{Fe(II)-O}} 1.700 \text{ \AA}^a$ | $r_{\text{Fe(III)-O}} 1.765 \text{ \AA}^a$ | average           |
|-----|-------------------------------------------|--------------------------------------------|-------------------------------------------|--------------------------------------------|-------------------|
| Fe1 | 3.41                                      | 3.97                                       |                                           |                                            | 3.69 <sup>b</sup> |
| Fe2 |                                           |                                            | 1.69                                      | 2.02                                       | 1.85              |
| Fe3 |                                           |                                            | 1.83                                      | 2.18                                       | 2.00              |

<sup>a</sup>  $r_0$  values are originated from the ref: Liu, W.; Thorp, H. H. *Inorg. Chem.* **1993**, *32*, 4102-4105. <sup>b</sup> The calculation result is a little deviated from the true oxidation state, but indicating that Fe1 should possess the relatively high oxidation state (which is close to +3 oxidation state).

**Table S7-2.** BVS calculations of transitional metal centers in compounds **2-4**<sup>a</sup>

|         | <b>2</b>    | <b>3</b>    | <b>4</b>    |
|---------|-------------|-------------|-------------|
| Mn1/Mn2 | 1.81 / 1.95 |             |             |
| Cd1/Cd2 |             | 2.18 / 2.14 |             |
| Mn1/Mn2 |             |             | 1.81 / 1.93 |

<sup>a</sup>  $V = \sum_{i=1}^6 \exp\left(\frac{r_0 - r_i}{0.37}\right)$  ( $r_0$  (Mn(II)-O) = 1.765(1) Å,  $r_0$  (Mn(II)-O) = 1.904(4) Å, ref: Brown, I. D.; Altermatt, D. *Acta. Crystallogr. Sect. B.* **1985**, *41*, 244-247).

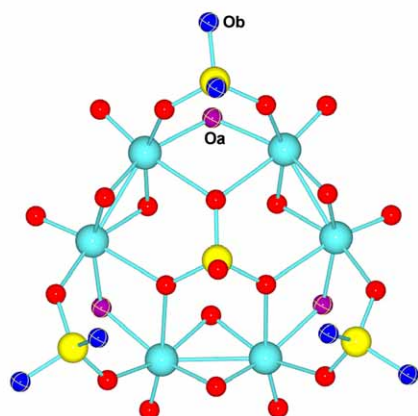

**Table S8.** BVS calculations of {OH}, {HPO<sub>4</sub>} and {H<sub>2</sub>PO<sub>4</sub>} groups in compounds **1-4**<sup>a</sup>

|                                                                                               |                     | <b>1</b>                          |      | <b>2</b> |      | <b>3</b> |      | <b>4</b> |      |
|-----------------------------------------------------------------------------------------------|---------------------|-----------------------------------|------|----------|------|----------|------|----------|------|
|  <b>Oa</b>   | μ-{OH}              | O6                                | 1.19 | O8       | 1.17 | O3       | 1.11 | O7       | 1.18 |
|                                                                                               |                     | O8                                | 1.13 | O9       | 1.19 | O9       | 1.09 | O9       | 1.17 |
|                                                                                               |                     | O13                               | 1.21 | O10      | 1.19 | O13      | 1.11 | O29      | 1.14 |
|  <b>Ob</b> | {HPO <sub>4</sub> } | O30                               | 1.12 | O22      | 1.36 | O23      | 1.13 | O28      | 1.20 |
|                                                                                               |                     |                                   |      |          |      |          |      | O31      | 1.36 |
|                                                                                               |                     | {H <sub>2</sub> PO <sub>4</sub> } | O23  | 1.32     | O26  | 1.16     | O16  | 1.11     |      |
| O31                                                                                           | 1.19                |                                   | O27  | 1.36     | O28  | 1.31     |      |          |      |

<sup>a</sup> ( $r_0$  (Mo-O) = 1.907(2) Å,  $r_0$  (P-O) = 1.617(1) Å,  $r_0$  (Sr-O) = 2.118(6) Å, ref: Brown, I. D.; Altermatt, D. *Acta Crystallogr. Sect. B.* **1985**, *41*, 244-247).

### 3. Physical characterization

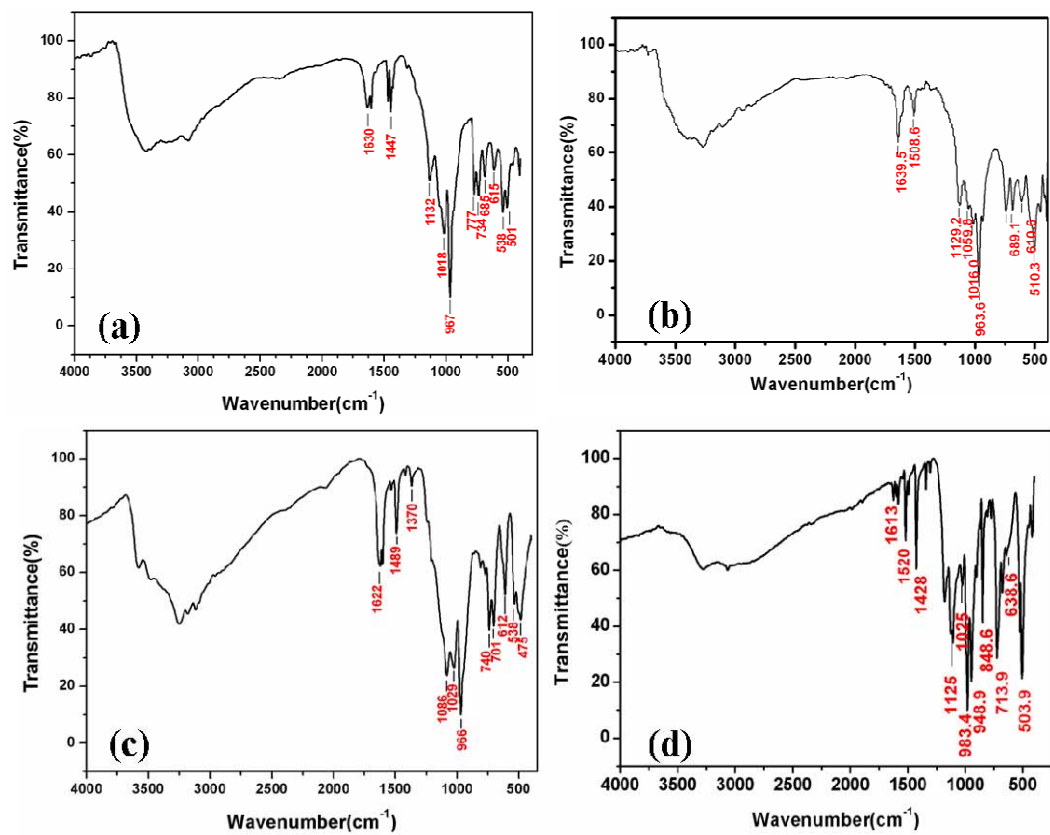

Fig. S10 IR spectra of (a) compound 1, (b) compound 2, (c) compound (3) and (d) compound 4

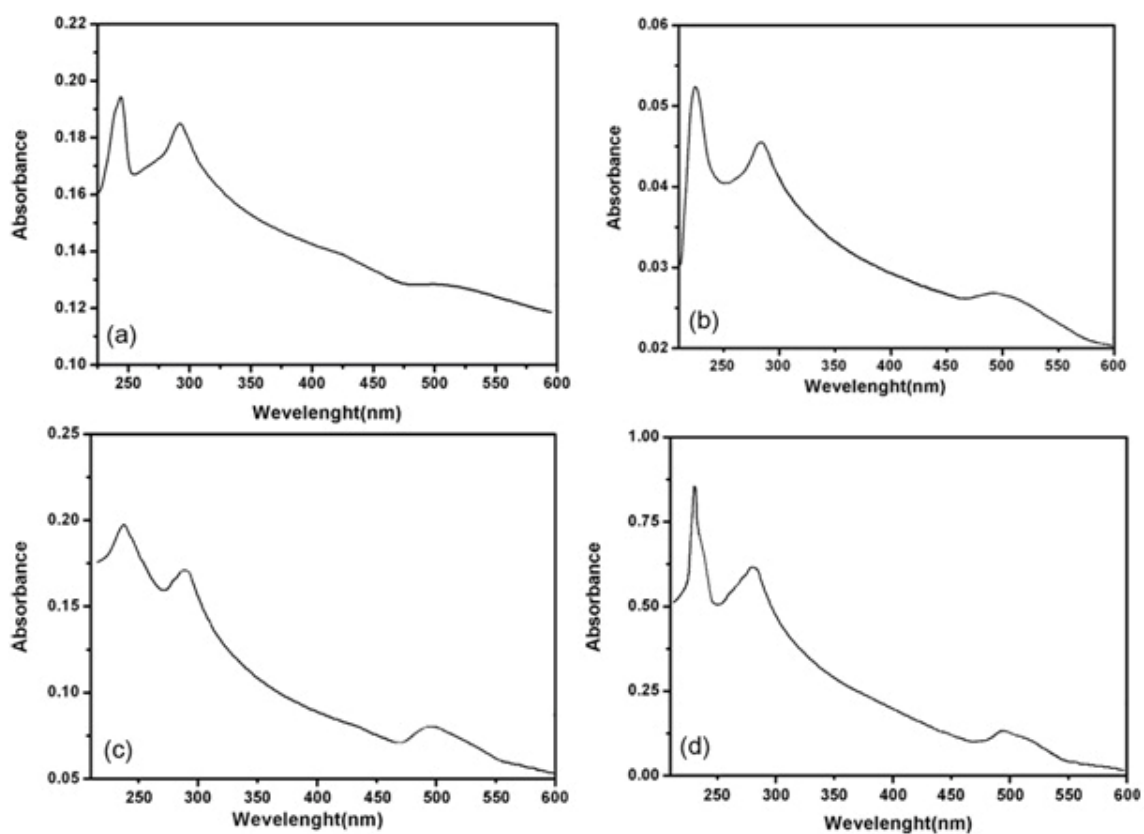

**Fig. S11** Solid state UV-vis spectra of (a) compound 1, (b) compound 2, (c) compound 3 and (d) compound 4

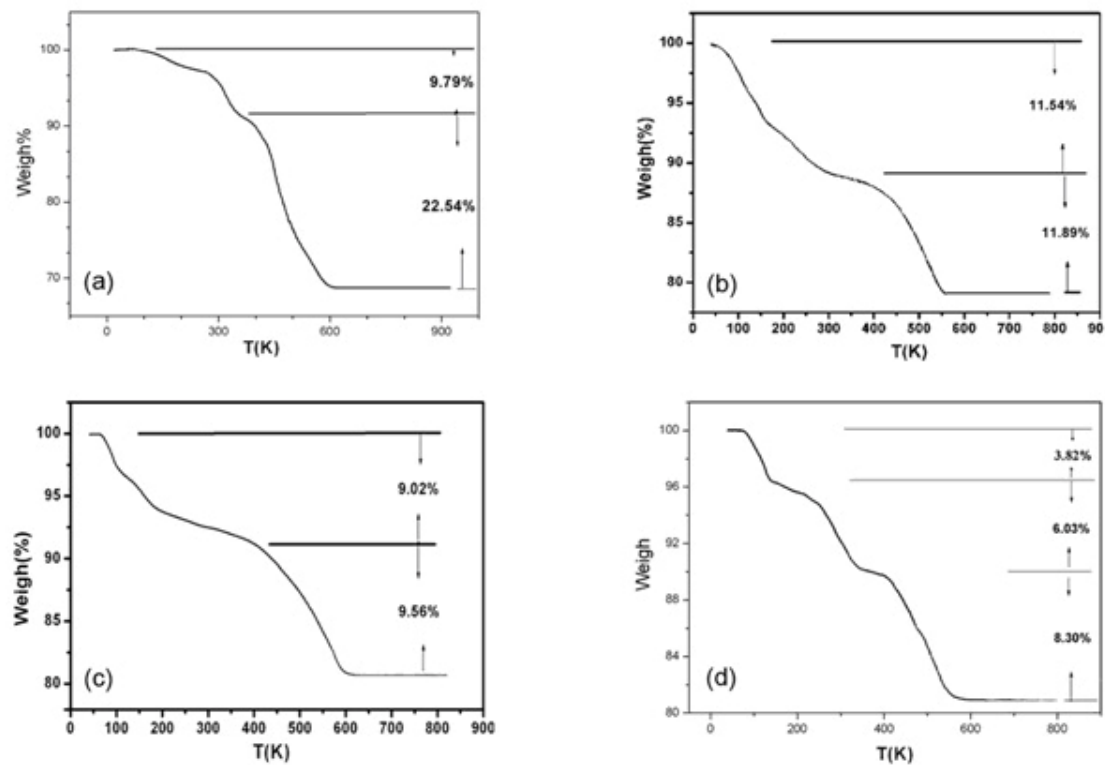

**Fig. S12** TG of (a) compound 1, (b) compound 2, (c) compound 3 and (d) compound 4

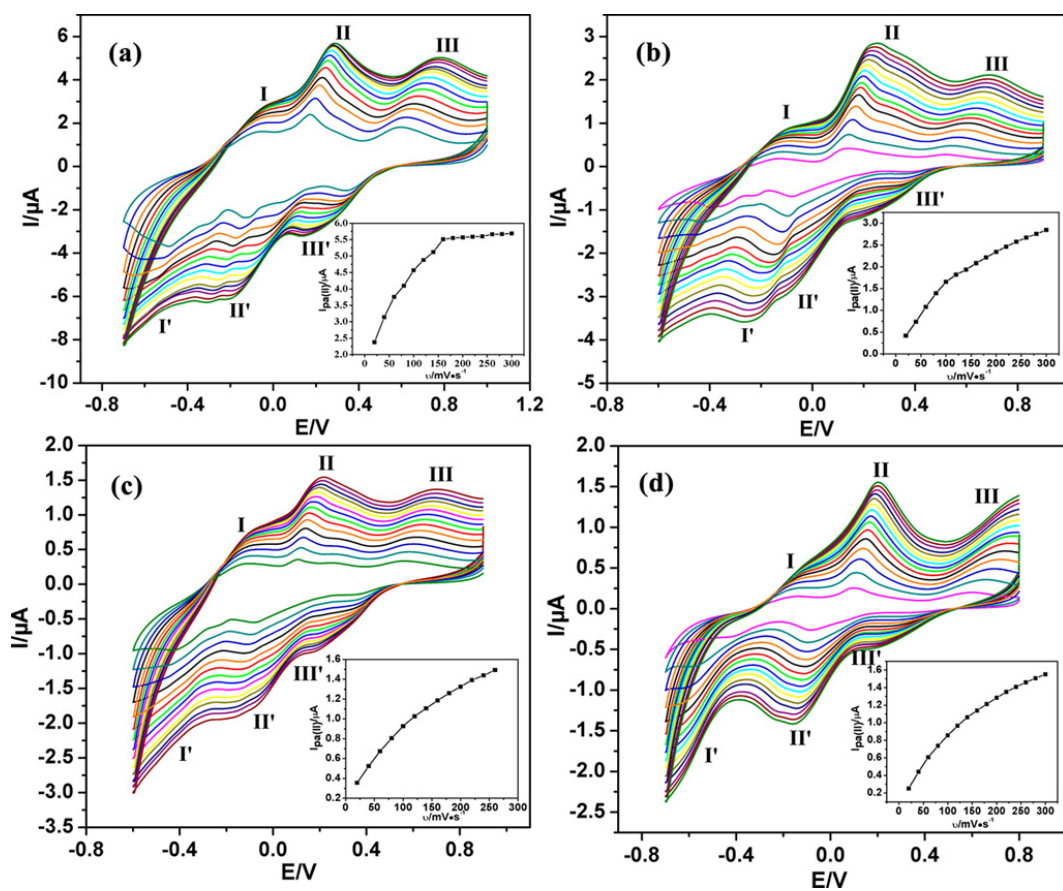

**Fig. S13** Cyclic voltammograms of (a) 1-CPE, (b) 2-CPE, (c) 3-CPE, and (d) 4-CPE in the 1.0 M  $\text{H}_2\text{SO}_4$  solution at different scan rates (from inner to outer: 20, 40, 60, 80, 100, 120, 140, 160, 180, 200  $\text{mV s}^{-1}$ ). Potentials vs. SCE. (Insert plots: The dependence of anodic peak II current on scan rates.)
